# Supplementary material for: SIRT2 Affects Primary Cilia Formation by Regulating mTOR Signaling in Retinal Pigmented Epithelial Cells
Source: MDPI journal article supplement (doi:10.3390/ijms21062240), 2020-03-24
Supplement: s1 [file s1]

## Supplementary Materials and Methods

### Drug treatment

Chloroquine (C6628) and bafilomycin A1 (B1793) were obtained from Sigma-Aldrich (St. Louis, MO, USA). hTERT-RPE1 cells were treated with chloroquine and bafilomycin A1 for 12 h prior to lysis.

### Western blotting

Western blotting was performed according to a standard protocol. The following antibodies were used for Western blotting.  $\alpha$ -tubulin-acetyl K40 (T7451) and  $\alpha$ -tubulin (PA5-29444) was purchased from Sigma-Aldrich (St. Louis, MO, USA) and Invitrogen (Carlsbad, CA, USA; 13778-150), respectively. AKT (4691) and AKT-pS473 (4060) was purchased from Cell Signaling Technology, Inc. (Danvers, MA, USA). H3 (07-690) was obtained from Merck Millipore (Burlington, MA, USA AKT)

## Supplementary Figures

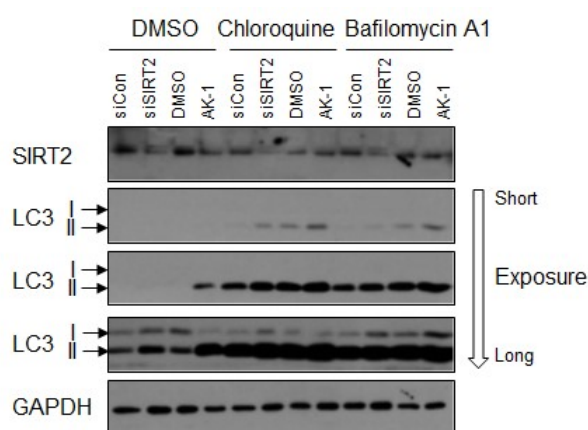

**Figure S1.** SIRT2 is a negative regulator of autophagy induction. hTERT-RPE1 cells were transfected with control siRNA (siCon) or SIRT2-targeting siRNA (siSIRT2), or treated with 0.1% DMSO or 10  $\mu$ M AK-1, a SIRT2-specific inhibitor, for 48 h. The autophagic clearance was blocked by treating cells with 100  $\mu$ M chloroquine or 10 nM bafilomycin A1 for 12 h prior to lysis.

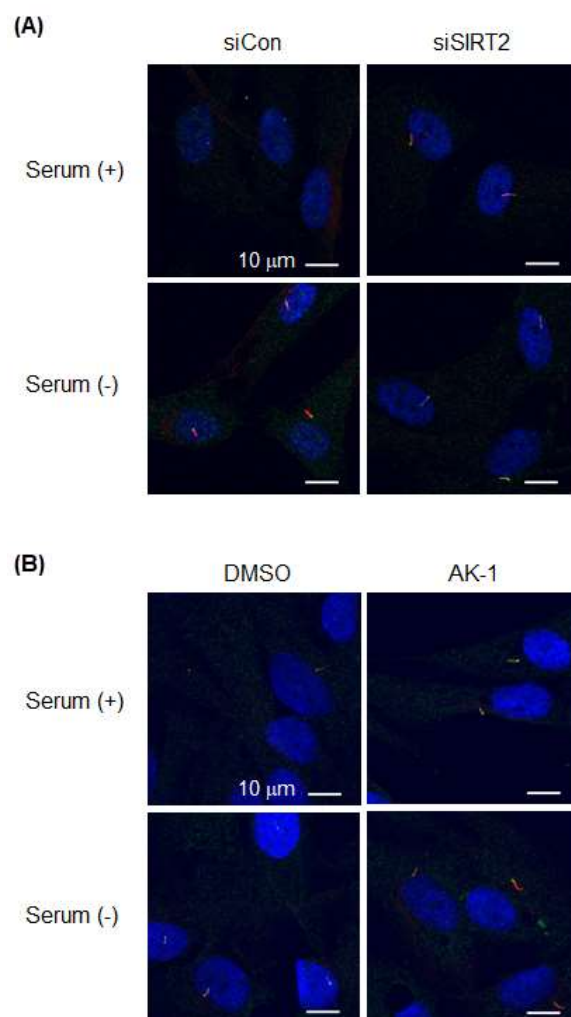

**Figure S2.** Suppression of SIRT2 increases ciliogenesis in the presence of serum, but not in the absence of serum. hTERT-RPE1 cells were transfected with control siRNA (siCon) or SIRT2-targeting siRNA (siSIRT2) (**A**), or treated with 0.1% DMSO or 10  $\mu$ M AK-1, a SIRT2-specific inhibitor (**B**), in the presence or absence of serum for 48 h. Cilia were visualized by staining with antibodies specific for IFT88 (green) and  $\alpha$ -tubulin-acetyl K40 (red), and nuclei were stained with Hoechst. Scale bars, 10  $\mu$ m.

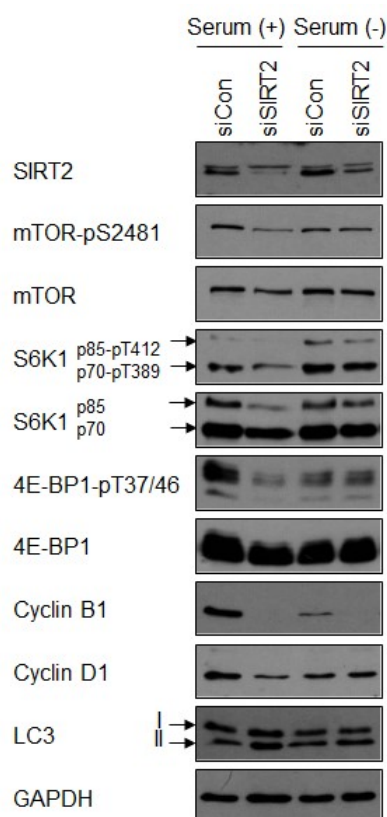

**Figure S3.** The SIRT2-regulated mTOR signaling is dependent on serum presence. hTERT-RPE1 cells were transfected with control siRNA (siCon) or SIRT2-targeting siRNA (siSIRT2) in the presence or absence of serum for 48 h. Expression of SIRT2, mTOR, its substrates, cyclins and LC3 was determined by western blotting.

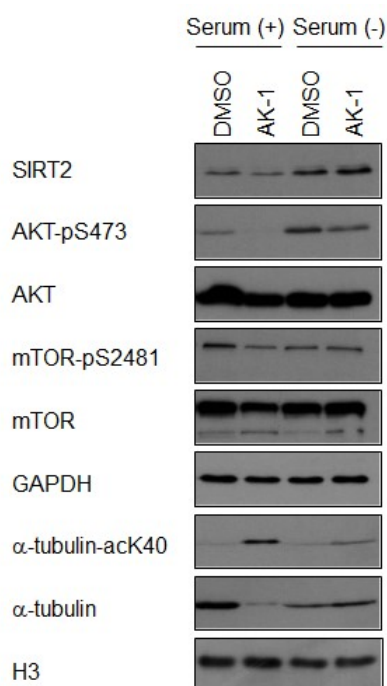

**Figure S4.** The activity of SIRT2 and AKT is inhibited in AK-1-treated cells under serum-proficient conditions. hTERT-RPE1 cells were treated with 0.1% DMSO or 10  $\mu$ M AK-1 in the presence or absence of serum for 48 h. Expression of SIRT2,  $\alpha$ -tubulin-acetyl K40 and, AKT-pS473 was determined by western blotting.

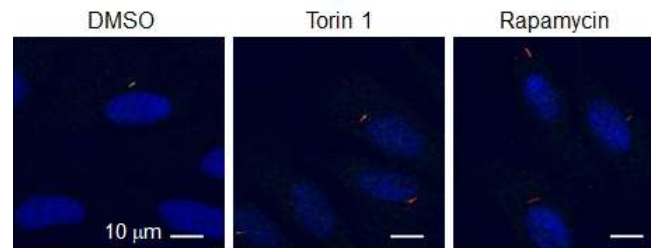

**Figure S5.** Suppression of mTOR signaling increases ciliogenesis. hTERT-RPE1 cells were treated with 0.1% DMSO, 0.2  $\mu$ M torin 1, or 15  $\mu$ M rapamycin for 48 h. Cilia were visualized by staining with antibodies specific for IFT88 (green) and  $\alpha$ -tubulin-acetyl K40 (red), and nuclei were stained with Hoechst. Scale bars, 10  $\mu$ m.

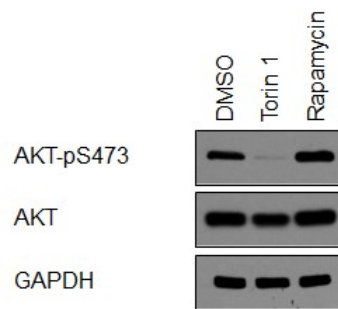

**Figure S6.** Inhibition of mTORC2, not mTORC1, results in inactivation of AKT. hTERT-RPE1 cells were treated with 0.1% DMSO, 0.2  $\mu$ M torin 1, or 15  $\mu$ M rapamycin for 48 h. Expression of AKT phosphorylation at S473 was determined by western blotting.
